# Supplementary material for: NK cell-derived exosomes enhance the anti-tumor effects against ovarian cancer by delivering cisplatin and reactivating NK cell functions
Source: PubMed Central journal article supplement (PMC9892755; doi:10.3389/fimmu.2022.1087689), 2023-01-19
Supplement: DataSheet_1.pdf [file DataSheet_1.pdf]

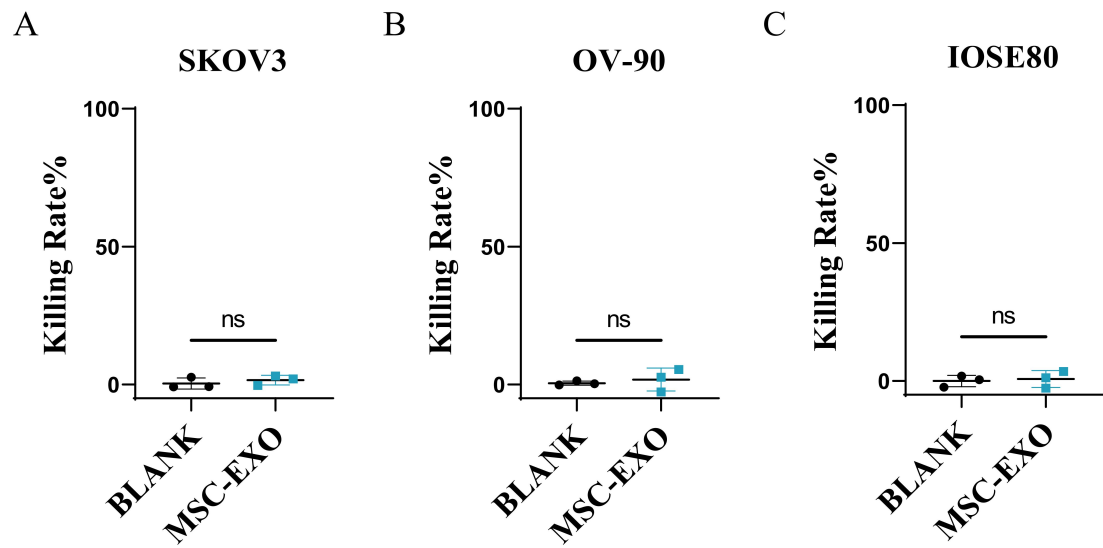

**Supplementary Figure S1** Anti-tumor activity of MSC-exo *in vitro*. CCK-8 assay showing the cytotoxicity of MSC-exo against SKOV3(A), OV-90(B) and IOSE80 (C) (n=3, mean  $\pm$  SEM).

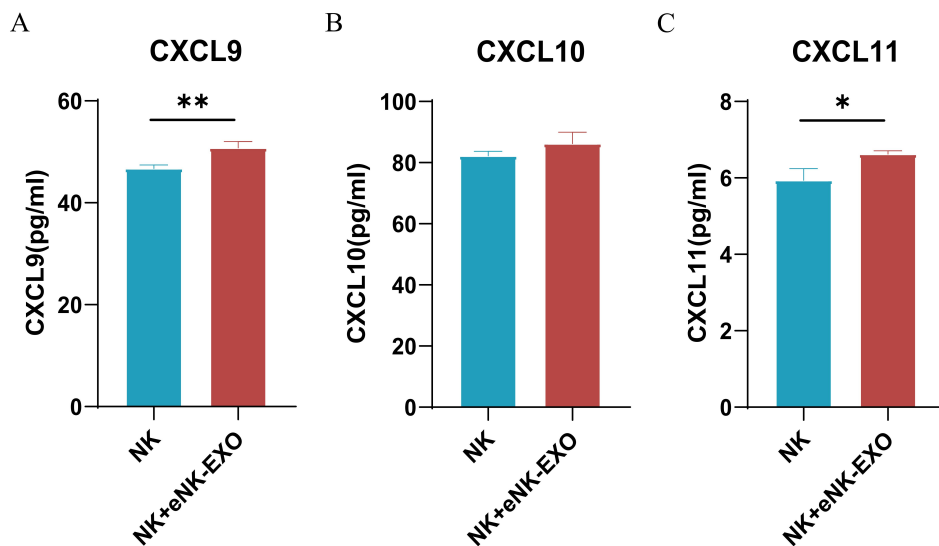

**Supplementary Figure S2** ELISA measurement of CXCL9(A), CXCL10(B) and CXCL11(C) level in the supernatants of eNK-EXO treated NK cells (n=3, mean  $\pm$  SEM, \*\* $p < 0.05$ , \*\*\* $p < 0.01$ ).

**Supplementary Table S1** The clinicopathological features of 7 ovarian cancer patients.

| NO. | Age (year) | Pathologic type             | FIGO stage | Peritoneal metastasis |
|-----|------------|-----------------------------|------------|-----------------------|
| #1  | 33         | Malignant ovarian cancer    | IV         | Yes                   |
| #2  | 53         | High-grade serous carcinoma | IIIC       | Yes                   |
| #3  | 45         | Mucinous cystadenocarcinoma | IC         | NO                    |
| #4  | 63         | Clear cell carcinoma        | IIA        | Yes                   |
| #5  | 55         | High-grade serous carcinoma | IIIC       | Yes                   |
| #6  | 69         | High-grade serous carcinoma | IIIC       | Yes                   |
| #7  | 44         | High-grade serous carcinoma | IIIC       | Yes                   |
